# Supplementary material
Source: PubMed Central journal article supplement (PMC3017474)
Supplement: NIHMS251178-supplement-Supp_Table_S1-_S2.pdf [file NIHMS251178-supplement-Supp_Table_S1-_S2.pdf]

Table S1. Bacterial strains or plasmids used in this study

| Strain or plasmid    | Description                                                                                                                                                                                             | Source or reference              |
|----------------------|---------------------------------------------------------------------------------------------------------------------------------------------------------------------------------------------------------|----------------------------------|
| <b>Strains</b>       |                                                                                                                                                                                                         |                                  |
| <i>P. gingivalis</i> |                                                                                                                                                                                                         |                                  |
| 33277                | Wild type parental strain from ATCC                                                                                                                                                                     | Lab stock                        |
| $\Delta cdhR$        | <i>cdhR::ermF</i> (CdhR <sup>-</sup> Em <sup>r</sup> )                                                                                                                                                  | (Wu <i>et al.</i> , 2009)        |
| C $\Delta cdhR$      | <i>cdhR::ermF</i> pT1373 (CdhR <sup>+</sup> Em <sup>r</sup> Tc <sup>r</sup> )                                                                                                                           | This study                       |
| $\Delta ltp1$        | <i>ltp1::ermF</i> (Ltp1 <sup>-</sup> Em <sup>r</sup> )                                                                                                                                                  | (Simionato <i>et al.</i> , 2006) |
| $\Delta luxS$        | <i>luxS::ermF</i> (LuxS <sup>-</sup> Em <sup>r</sup> )                                                                                                                                                  | (James <i>et al.</i> , 2006)     |
| SMF1                 | <i>mfa::ermF</i> (Mfa <sup>-</sup> Em <sup>r</sup> )                                                                                                                                                    | (Park <i>et al.</i> , 2005)      |
| <i>S. gordonii</i>   |                                                                                                                                                                                                         |                                  |
| DL1                  | Wild type                                                                                                                                                                                               | Lab stock                        |
| <i>S. cristatus</i>  |                                                                                                                                                                                                         |                                  |
| CC5A                 | Wild type                                                                                                                                                                                               | Lab stock                        |
| <i>E. coli</i>       |                                                                                                                                                                                                         |                                  |
| J53                  | K12 F <sup>-</sup> met <sup>-</sup> pro <sup>-</sup>                                                                                                                                                    |                                  |
| TOP10                | F <sup>-</sup> mcrA $\Delta$ (mrr-hsdRMS-mcrBC) $\phi$ 80lacZ $\Delta$ M15 $\Delta$ lacX74 nupG recA1 araD139 $\Delta$ (ara-leu)7697 galE15 galK16 rpsL(Str <sup>R</sup> ) endA1 $\lambda$ <sup>-</sup> | Invitrogen                       |
| BL21 (DE3)           | F <sup>-</sup> ompT gal dcm lon hsdS <sub>B</sub> (r <sub>B</sub> <sup>-</sup> m <sub>B</sub> <sup>-</sup> ) $\lambda$ (DE3 [lacI lacUV5-T7 gene 1 ind1 sam7 nin5])                                     | Novagen                          |

Plasmids

|             |                                                                                                                                                   |            |
|-------------|---------------------------------------------------------------------------------------------------------------------------------------------------|------------|
| pTCOW       | Circular shuttle plasmid derived from (Gardner <i>et al.</i> , 1996)<br>pVAL1, Tet <sup>r</sup>                                                   |            |
| pT1373      | <i>cdhR</i> in pTCOW                                                                                                                              | This study |
| pET30b      | Circular plasmid carrying an N-terminal His tag/thrombin/enterokinase configuration plus an optional C-terminal His tag sequence, Km <sup>r</sup> | Novagen    |
| pCR4-TOPO   | Linearized plasmid with single 3' deoxyribosylthymine residues, Km <sup>r</sup> Am <sup>r</sup>                                                   | Invitrogen |
| pET30b-1373 | <i>cdhR</i> in pET30b                                                                                                                             | This study |

---

Table S2. Primers for PCR

| Name    | Sequence                                 |
|---------|------------------------------------------|
| 1372-3f | 5'-GCTAGCTTGCTTTAAGTTAGTTGGATTCATTAA-3'  |
| 1372-3r | 5'-GCGGCGTCCTCATCGATCTCACCGCTCGGCCG-3'   |
| 1372f   | 5'-GCTAAGTGACTTGATATGCGAGAATTACGA-3'     |
| 1371f   | 5'-TAAAATTCGCTGCAAAAGTATGGATTATTC-3'     |
| 1373r   | 5'-GCTCTTCGGCAATCTCTTTG-3'               |
| MFAf    | 5'-TGCGGCGAAGTCGTAATG-3'                 |
| MFAr    | 5'-ATCTTCAGCACTCTCACAAG-3'               |
| LUXf    | 5'-GAATGAAAGAGCCCAATCG-3'                |
| LUXr    | 5'-GTAATGGCCTCGCATCAG-3'                 |
| LTPf    | 5'-TTCAGCAGTAGCGGTATTCACG-3'             |
| LTPr    | 5'-TGCGGATAGGGAGGAGTTGTC-3'              |
| CDHf    | 5'-AAGACCTTGGAGCCTGAAGAG-3'              |
| CDHr    | 5'-TCATGATGGCATAGATGGTCA-3'              |
| 16Sf    | 5'-AGGAACTCCGATTGCGAAGG-3'               |
| 16Sr    | 5'-TCGTTTACTGCGTGGACTACC-3'              |
| CDHO    | 5'-TTCGTAGCTCATGTGCTTGC GTA-3'           |
| CDHI    | 5'-GACAGATCTGACAAGACAGTCTCGGA-3'         |
| RDCf    | 5'-CAGTCGATATCCATGAATATCATCACACTCAAGG-3' |
| RCDr    | 5'-CAGTCAAGCTTTTAGTGGGCGATTTCGTCGA-3'    |
| EMFf    | 5'-TACAAGCTGTTTCAGGTGAAGT-3'             |
| EMFr    | 5'-AAGCCAAATGTTTAAAAGGATTAA-3'           |
| ELUf    | 5'-AGTCCGGTACAATACCGACTCTTTCT-3'         |
| ELUr    | 5'-TGCTGTACGGCTTCTATTCTTCGATC-3'         |
| FETf    | 5'-ACTCGCCACATCGCATCGTTTCGC-3'           |
| FETr    | 5'-CTCTGTTCTTAAATTAATTTGTGA-3'           |

## References

- Gardner, R.G., Russell, J.B., Wilson, D.B., Wang, G.R., and Shoemaker, N.B. (1996) Use of a modified *Bacteroides-Prevotella* shuttle vector to transfer a reconstructed beta-1,4-D-endoglucanase gene into *Bacteroides uniformis* and *Prevotella ruminicola* B(1)4. *Appl Environ Microbiol* **62**: 196-202.
- James, C.E., Hasegawa, Y., Park, Y., Yeung, V., Tribble, G.D., Kuboniwa, M., *et al.* (2006) LuxS involvement in the regulation of genes coding for hemin and iron acquisition systems in *Porphyromonas gingivalis*. *Infect Immun* **74**: 3834-3844.
- Park, Y., Simionato, M.R., Sekiya, K., Murakami, Y., James, D., Chen, W., *et al.* (2005) Short fimbriae of *Porphyromonas gingivalis* and their role in coadhesion with *Streptococcus gordonii*. *Infect Immun* **73**: 3983-3989.
- Simionato, M.R., Tucker, C.M., Kuboniwa, M., Lamont, G., Demuth, D.R., Tribble, G.D., and Lamont, R.J. (2006) *Porphyromonas gingivalis* genes involved in community development with *Streptococcus gordonii*. *Infect Immun* **74**: 6419-6428.
- Wu, J., Lin, X., and Xie, H. (2009) Regulation of hemin binding proteins by a novel transcriptional activator in *Porphyromonas gingivalis*. *J Bacteriol* **191**: 115-122.
